# Supplementary material for: Redox bifunctionality in a Pt(ii) dithiolene complex of a tetrathiafulvalene diphosphine ligand
Source: Royal Society of Chemistry journal article supplement (doi:10.1039/b812797b), 2008-01-01
Supplement: b812797b.pdf [file b812797b.pdf]

# Redox bifunctionality in Pt(II) dithiolene complex of a tetrathiafulvalene diphosphine ligand

Kyong-Soon Shin, YounJung Jung, Su-Kyung Lee, Marc Fourmigué, Frédéric Barrière, Jean-François Bergamini and Dong-Youn Noh

## Supplementary Information

Atomic coordinates of the optimized structure of (**P2**)Pt(dmit) (B3LYP/LanL2DZ)

| Center Number | Atomic Number | Atomic Type | Coordinates (Angstroms) |           |           |
|---------------|---------------|-------------|-------------------------|-----------|-----------|
|               |               |             | X                       | Y         | Z         |
| 1             | 78            | 0           | -1.663365               | -0.000796 | 0.031578  |
| 2             | 15            | 0           | 0.056329                | -1.642688 | 0.126084  |
| 3             | 15            | 0           | 0.057271                | 1.642879  | 0.119308  |
| 4             | 16            | 0           | 6.570997                | -1.539109 | 0.156399  |
| 5             | 16            | 0           | 6.577175                | 1.527002  | 0.129539  |
| 6             | 16            | 0           | 3.237435                | -1.535743 | 0.657460  |
| 7             | 16            | 0           | 3.238588                | 1.540494  | 0.635893  |
| 8             | 16            | 0           | -3.370435               | -1.715679 | -0.055493 |
| 9             | 16            | 0           | -3.378429               | 1.705724  | -0.072400 |
| 10            | 16            | 0           | -6.483657               | -1.523875 | -0.292544 |
| 11            | 16            | 0           | -6.491564               | 1.498003  | -0.297540 |
| 12            | 16            | 0           | -9.181160               | -0.020222 | -0.486873 |
| 13            | 6             | 0           | 9.264816                | -1.630102 | -0.675423 |
| 14            | 1             | 0           | 10.177185               | -1.081011 | -0.924984 |
| 15            | 1             | 0           | 9.010147                | -2.269121 | -1.531164 |
| 16            | 1             | 0           | 9.490001                | -2.287104 | 0.175413  |
| 17            | 6             | 0           | 9.271742                | 1.591770  | -0.703314 |
| 18            | 1             | 0           | 10.181916               | 1.034247  | -0.941976 |
| 19            | 1             | 0           | 9.499110                | 2.263234  | 0.135544  |
| 20            | 1             | 0           | 9.020483                | 2.216123  | -1.570801 |
| 21            | 6             | 0           | 8.133005                | -0.688953 | -0.345936 |
| 22            | 6             | 0           | 8.135800                | 0.661517  | -0.357606 |
| 23            | 6             | 0           | 5.578815                | -0.002797 | 0.283675  |
| 24            | 6             | 0           | 4.245130                | 0.000881  | 0.483978  |
| 25            | 6             | 0           | 1.646106                | -0.676438 | 0.378359  |
| 26            | 6             | 0           | 1.648126                | 0.677659  | 0.358842  |
| 27            | 6             | 0           | -4.858351               | -0.686009 | -0.178117 |
| 28            | 6             | 0           | -4.862189               | 0.668633  | -0.180254 |
| 29            | 6             | 0           | -7.499537               | -0.015721 | -0.366482 |
| 30            | 6             | 0           | 0.318652                | -2.637903 | -1.437307 |
| 31            | 6             | 0           | 1.244803                | -3.702040 | -1.497681 |
| 32            | 1             | 0           | 1.818028                | -3.990246 | -0.620424 |
| 33            | 6             | 0           | 1.425121                | -4.402706 | -2.702709 |
| 34            | 1             | 0           | 2.138599                | -5.221521 | -2.747808 |
| 35            | 6             | 0           | 0.682553                | -4.046512 | -3.846766 |
| 36            | 1             | 0           | 0.821914                | -4.593016 | -4.776436 |
| 37            | 6             | 0           | -0.243780               | -2.989022 | -3.782820 |
| 38            | 1             | 0           | -0.826800               | -2.717342 | -4.658718 |
| 39            | 6             | 0           | -0.428098               | -2.282585 | -2.579287 |
| 40            | 1             | 0           | -1.156192               | -1.477883 | -2.520434 |
| 41            | 6             | 0           | 0.026914                | -2.863410 | 1.541875  |
| 42            | 6             | 0           | -0.583989               | -4.122816 | 1.368435  |
| 43            | 1             | 0           | -0.985460               | -4.414745 | 0.401835  |
| 44            | 6             | 0           | -0.690661               | -5.004526 | 2.458903  |

|    |   |   |           |           |           |
|----|---|---|-----------|-----------|-----------|
| 45 | 1 | 0 | -1.167841 | -5.971277 | 2.321824  |
| 46 | 6 | 0 | -0.193870 | -4.632818 | 3.722360  |
| 47 | 1 | 0 | -0.279659 | -5.315369 | 4.564185  |
| 48 | 6 | 0 | 0.406570  | -3.370695 | 3.895586  |
| 49 | 1 | 0 | 0.786111  | -3.075719 | 4.870480  |
| 50 | 6 | 0 | 0.512112  | -2.483014 | 2.810779  |
| 51 | 1 | 0 | 0.966756  | -1.507108 | 2.959968  |
| 52 | 6 | 0 | 0.004278  | 2.857016  | 1.543389  |
| 53 | 6 | 0 | -0.880242 | 2.600245  | 2.610445  |
| 54 | 1 | 0 | -1.545575 | 1.742200  | 2.569303  |
| 55 | 6 | 0 | -0.919466 | 3.477574  | 3.710487  |
| 56 | 1 | 0 | -1.609311 | 3.283060  | 4.527297  |
| 57 | 6 | 0 | -0.079566 | 4.606365  | 3.745122  |
| 58 | 1 | 0 | -0.113885 | 5.284539  | 4.594372  |
| 59 | 6 | 0 | 0.799257  | 4.864046  | 2.673819  |
| 60 | 1 | 0 | 1.444535  | 5.738496  | 2.694826  |
| 61 | 6 | 0 | 0.842470  | 3.992824  | 1.571807  |
| 62 | 1 | 0 | 1.512864  | 4.207392  | 0.743045  |
| 63 | 6 | 0 | 0.343484  | 2.663437  | -1.422937 |
| 64 | 6 | 0 | -0.449492 | 3.811668  | -1.635618 |
| 65 | 1 | 0 | -1.178117 | 4.126717  | -0.893183 |
| 66 | 6 | 0 | -0.312002 | 4.546474  | -2.826071 |
| 67 | 1 | 0 | -0.929375 | 5.426213  | -2.987094 |
| 68 | 6 | 0 | 0.610848  | 4.138335  | -3.808573 |
| 69 | 1 | 0 | 0.713794  | 4.706991  | -4.729477 |
| 70 | 6 | 0 | 1.394889  | 2.988433  | -3.597705 |
| 71 | 1 | 0 | 2.106501  | 2.666119  | -4.353602 |
| 72 | 6 | 0 | 1.260650  | 2.247717  | -2.409196 |
| 73 | 1 | 0 | 1.870213  | 1.360677  | -2.261369 |

-----

Orbitals energies for the optimized structure of (P2)Pt(dmit) (B3LYP/LanL2DZ)

Alpha occ. eigenvalues -- -10.27708 -10.27542 -10.27457 -10.27383 -10.27163  
Alpha occ. eigenvalues -- -10.25949 -10.25875 -10.23521 -10.23503 -10.23485  
Alpha occ. eigenvalues -- -10.23467 -10.22910 -10.22839 -10.22658 -10.22601  
Alpha occ. eigenvalues -- -10.22379 -10.22353 -10.22283 -10.22227 -10.22212  
Alpha occ. eigenvalues -- -10.22157 -10.22111 -10.22088 -10.22070 -10.22052  
Alpha occ. eigenvalues -- -10.22045 -10.22040 -10.21985 -10.21974 -10.21885  
Alpha occ. eigenvalues -- -10.21882 -10.21825 -10.21796 -10.21789 -10.21762  
Alpha occ. eigenvalues -- -3.94268 -2.17165 -2.16903 -2.12796 -0.91787  
Alpha occ. eigenvalues -- -0.89727 -0.88442 -0.88240 -0.87743 -0.87704  
Alpha occ. eigenvalues -- -0.87503 -0.83631 -0.80860 -0.79968 -0.79870  
Alpha occ. eigenvalues -- -0.78994 -0.78197 -0.77391 -0.77200 -0.77170  
Alpha occ. eigenvalues -- -0.77131 -0.76981 -0.76867 -0.76845 -0.76258  
Alpha occ. eigenvalues -- -0.73361 -0.71774 -0.71035 -0.69799 -0.69130  
Alpha occ. eigenvalues -- -0.68190 -0.66229 -0.63448 -0.63283 -0.63159  
Alpha occ. eigenvalues -- -0.63155 -0.62999 -0.62241 -0.62209 -0.60709  
Alpha occ. eigenvalues -- -0.59846 -0.56246 -0.55175 -0.54330 -0.54205  
Alpha occ. eigenvalues -- -0.54031 -0.53499 -0.52414 -0.51823 -0.50404  
Alpha occ. eigenvalues -- -0.50096 -0.48835 -0.48191 -0.48085 -0.47898  
Alpha occ. eigenvalues -- -0.47654 -0.47404 -0.47306 -0.46900 -0.46852  
Alpha occ. eigenvalues -- -0.46379 -0.45943 -0.45051 -0.44810 -0.44723  
Alpha occ. eigenvalues -- -0.44616 -0.44372 -0.44144 -0.44141 -0.43701  
Alpha occ. eigenvalues -- -0.43631 -0.43033 -0.42516 -0.41987 -0.41350  
Alpha occ. eigenvalues -- -0.41044 -0.40320 -0.39317 -0.39222 -0.39030  
Alpha occ. eigenvalues -- -0.38781 -0.38719 -0.38304 -0.38205 -0.38104  
Alpha occ. eigenvalues -- -0.37838 -0.37308 -0.37201 -0.37117 -0.36947  
Alpha occ. eigenvalues -- -0.36756 -0.36408 -0.36242 -0.35974 -0.35825  
Alpha occ. eigenvalues -- -0.35743 -0.35555 -0.33780 -0.32052 -0.31876

|                            |          |          |          |          |          |
|----------------------------|----------|----------|----------|----------|----------|
| Alpha occ. eigenvalues --  | -0.31535 | -0.30944 | -0.30833 | -0.30043 | -0.29090 |
| Alpha occ. eigenvalues --  | -0.28788 | -0.28525 | -0.28374 | -0.28189 | -0.28106 |
| Alpha occ. eigenvalues --  | -0.27780 | -0.27651 | -0.27352 | -0.27340 | -0.27221 |
| Alpha occ. eigenvalues --  | -0.26252 | -0.26081 | -0.25677 | -0.24749 | -0.22140 |
| Alpha occ. eigenvalues --  | -0.21488 | -0.20575 | -0.20452 | -0.17344 |          |
| Alpha virt. eigenvalues -- | -0.07462 | -0.07189 | -0.06363 | -0.05162 | -0.04779 |
| Alpha virt. eigenvalues -- | -0.04554 | -0.04136 | -0.03748 | -0.03515 | -0.03493 |
| Alpha virt. eigenvalues -- | -0.03011 | -0.02439 | -0.02111 | -0.01476 | -0.01078 |
| Alpha virt. eigenvalues -- | -0.00788 | -0.00375 | 0.00020  | 0.01049  | 0.01831  |
| Alpha virt. eigenvalues -- | 0.03302  | 0.03860  | 0.03987  | 0.04132  | 0.04314  |
| Alpha virt. eigenvalues -- | 0.05501  | 0.05849  | 0.06503  | 0.06624  | 0.07004  |
| Alpha virt. eigenvalues -- | 0.07695  | 0.07740  | 0.08597  | 0.09238  | 0.09572  |
| Alpha virt. eigenvalues -- | 0.09872  | 0.11062  | 0.11467  | 0.11532  | 0.11814  |
| Alpha virt. eigenvalues -- | 0.12177  | 0.12725  | 0.13152  | 0.13471  | 0.13762  |
| Alpha virt. eigenvalues -- | 0.13964  | 0.14383  | 0.14429  | 0.14674  | 0.14697  |
| Alpha virt. eigenvalues -- | 0.14830  | 0.15116  | 0.15186  | 0.15358  | 0.15499  |
| Alpha virt. eigenvalues -- | 0.15717  | 0.16191  | 0.16265  | 0.16596  | 0.17012  |
| Alpha virt. eigenvalues -- | 0.17120  | 0.17335  | 0.17522  | 0.17653  | 0.18027  |
| Alpha virt. eigenvalues -- | 0.18733  | 0.19564  | 0.19594  | 0.20619  | 0.21490  |
| Alpha virt. eigenvalues -- | 0.21901  | 0.22009  | 0.22393  | 0.22769  | 0.23257  |
| Alpha virt. eigenvalues -- | 0.23682  | 0.23868  | 0.24033  | 0.24370  | 0.24447  |
| Alpha virt. eigenvalues -- | 0.24718  | 0.24818  | 0.25566  | 0.26025  | 0.26479  |
| Alpha virt. eigenvalues -- | 0.26617  | 0.26982  | 0.27190  | 0.27337  | 0.27815  |
| Alpha virt. eigenvalues -- | 0.27951  | 0.28628  | 0.28833  | 0.29124  | 0.29738  |
| Alpha virt. eigenvalues -- | 0.30006  | 0.30371  | 0.30758  | 0.30827  | 0.31172  |
| Alpha virt. eigenvalues -- | 0.31355  | 0.31491  | 0.32144  | 0.32638  | 0.32930  |
| Alpha virt. eigenvalues -- | 0.33380  | 0.33676  | 0.33837  | 0.34578  | 0.34787  |
| Alpha virt. eigenvalues -- | 0.34927  | 0.35330  | 0.35463  | 0.35606  | 0.35825  |
| Alpha virt. eigenvalues -- | 0.36043  | 0.36453  | 0.36656  | 0.37136  | 0.37193  |
| Alpha virt. eigenvalues -- | 0.37679  | 0.38103  | 0.38299  | 0.38433  | 0.38565  |
| Alpha virt. eigenvalues -- | 0.38627  | 0.38668  | 0.38778  | 0.39238  | 0.39380  |
| Alpha virt. eigenvalues -- | 0.40071  | 0.40180  | 0.40363  | 0.40654  | 0.41184  |
| Alpha virt. eigenvalues -- | 0.41239  | 0.41353  | 0.41587  | 0.42090  | 0.42145  |
| Alpha virt. eigenvalues -- | 0.42333  | 0.42371  | 0.42467  | 0.42595  | 0.42895  |
| Alpha virt. eigenvalues -- | 0.43571  | 0.43646  | 0.43914  | 0.44414  | 0.44551  |
| Alpha virt. eigenvalues -- | 0.44779  | 0.44890  | 0.45247  | 0.45414  | 0.45897  |
| Alpha virt. eigenvalues -- | 0.46205  | 0.46418  | 0.46573  | 0.46689  | 0.46996  |
| Alpha virt. eigenvalues -- | 0.47244  | 0.47686  | 0.48124  | 0.48201  | 0.48477  |
| Alpha virt. eigenvalues -- | 0.49137  | 0.49366  | 0.49520  | 0.49725  | 0.50192  |
| Alpha virt. eigenvalues -- | 0.50603  | 0.51433  | 0.51738  | 0.52083  | 0.52257  |
| Alpha virt. eigenvalues -- | 0.52535  | 0.52686  | 0.52933  | 0.53598  | 0.54189  |
| Alpha virt. eigenvalues -- | 0.54252  | 0.54682  | 0.55367  | 0.55945  | 0.56102  |
| Alpha virt. eigenvalues -- | 0.56589  | 0.57045  | 0.57122  | 0.57656  | 0.58110  |
| Alpha virt. eigenvalues -- | 0.58294  | 0.58544  | 0.58655  | 0.59690  | 0.59975  |
| Alpha virt. eigenvalues -- | 0.60099  | 0.60518  | 0.61077  | 0.61301  | 0.61905  |
| Alpha virt. eigenvalues -- | 0.62582  | 0.63121  | 0.64078  | 0.64098  | 0.64418  |
| Alpha virt. eigenvalues -- | 0.65047  | 0.65345  | 0.65693  | 0.66355  | 0.66482  |
| Alpha virt. eigenvalues -- | 0.66735  | 0.67092  | 0.67553  | 0.67710  | 0.67855  |
| Alpha virt. eigenvalues -- | 0.68702  | 0.69202  | 0.70007  | 0.70683  | 0.71044  |
| Alpha virt. eigenvalues -- | 0.71853  | 0.72501  | 0.72827  | 0.73047  | 0.73804  |
| Alpha virt. eigenvalues -- | 0.74354  | 0.74794  | 0.75470  | 0.75835  | 0.75945  |
| Alpha virt. eigenvalues -- | 0.76275  | 0.76990  | 0.77670  | 0.78876  | 0.80715  |
| Alpha virt. eigenvalues -- | 0.81068  | 0.82465  | 0.84340  | 0.85755  | 0.86381  |
| Alpha virt. eigenvalues -- | 0.87873  | 0.89170  | 0.91442  | 0.92019  | 0.93378  |
| Alpha virt. eigenvalues -- | 0.94181  | 0.94303  | 0.96954  | 0.98719  | 0.99449  |
| Alpha virt. eigenvalues -- | 1.01136  | 1.01834  | 1.02427  | 1.05083  | 1.05357  |
| Alpha virt. eigenvalues -- | 1.05744  | 1.05901  | 1.05952  | 1.06091  | 1.06234  |
| Alpha virt. eigenvalues -- | 1.06547  | 1.07199  | 1.08888  | 1.10485  | 1.10917  |
| Alpha virt. eigenvalues -- | 1.11421  | 1.12031  | 1.12819  | 1.12900  | 1.14650  |
| Alpha virt. eigenvalues -- | 1.15580  | 1.15684  | 1.15883  | 1.15950  | 1.16541  |

|                            |          |          |          |          |          |
|----------------------------|----------|----------|----------|----------|----------|
| Alpha virt. eigenvalues -- | 1.20948  | 1.21092  | 1.21926  | 1.22370  | 1.22950  |
| Alpha virt. eigenvalues -- | 1.23568  | 1.24280  | 1.24923  | 1.25620  | 1.26753  |
| Alpha virt. eigenvalues -- | 1.28096  | 1.28465  | 1.28916  | 1.34086  | 1.35727  |
| Alpha virt. eigenvalues -- | 1.36616  | 1.38293  | 1.39076  | 1.40113  | 1.40402  |
| Alpha virt. eigenvalues -- | 1.41315  | 1.43910  | 1.45832  | 1.46744  | 1.52040  |
| Alpha virt. eigenvalues -- | 1.53469  | 1.54877  | 1.64905  | 1.65722  | 1.68695  |
| Alpha virt. eigenvalues -- | 1.69016  | 6.85901  | 9.38571  | 11.19113 | 12.56916 |
| Alpha virt. eigenvalues -- | 12.69467 | 13.91879 | 14.33089 | 14.49895 | 16.33915 |
| Alpha virt. eigenvalues -- | 17.31650 | 19.40343 | 19.64519 |          |          |
